# Supplementary material for: Rhodomyrtus tomentosa Fruits in Two Ripening Stages: Chemical Compositions, Antioxidant Capacity and Digestive Enzymes Inhibitory Activity
Source: MDPI journal article supplement (doi:10.3390/antiox11071390), 2022-07-18
Supplement: s1 [file s1]

Proximate composition

Free sugars

Organic acids

Amino acids

*Rhodomyrtus tomentosa* fruit (RTF)

Nutritional assessment

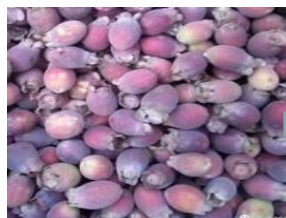

Un-fully mature fruit (UM-RTF)

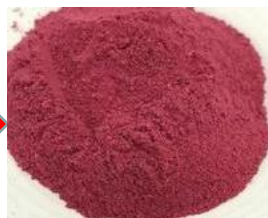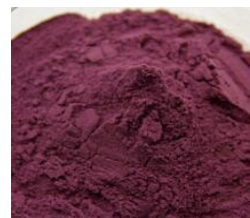

Fully mature fruit (FM-RTF)

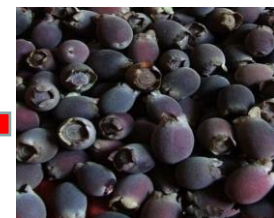

70% Methanol/water; Ultrasonic

Supernatant

Concentration

Aqueous phase

Extract with hexane

Hexane  
extracts

Aqueous phase

Extract with DE/EA=1:1

DE/EA phase

Concentration

Free phenolic

Residue

Alkaline hydrolysis  
Acidification

Supernatant

Residue

Extract with  
hexane

Aqueous phase

Hexane  
extracts

Extract with  
DE/EA=1:1

DE/EA phase

Concentration

Bound phenolic

HPLC-ESI-qTOF/MS  
HPLC

Antioxidant activity

Digestive enzymes  
inhibitory activity with  
*In silico* study
