# Supplementary figures and images for: Rhodomyrtus tomentosa Fruits in Two Ripening Stages: Chemical Compositions, Antioxidant Capacity and Digestive Enzymes Inhibitory Activity
Source: MDPI journal article supplement (doi:10.3390/antiox11071390), 2022-07-18

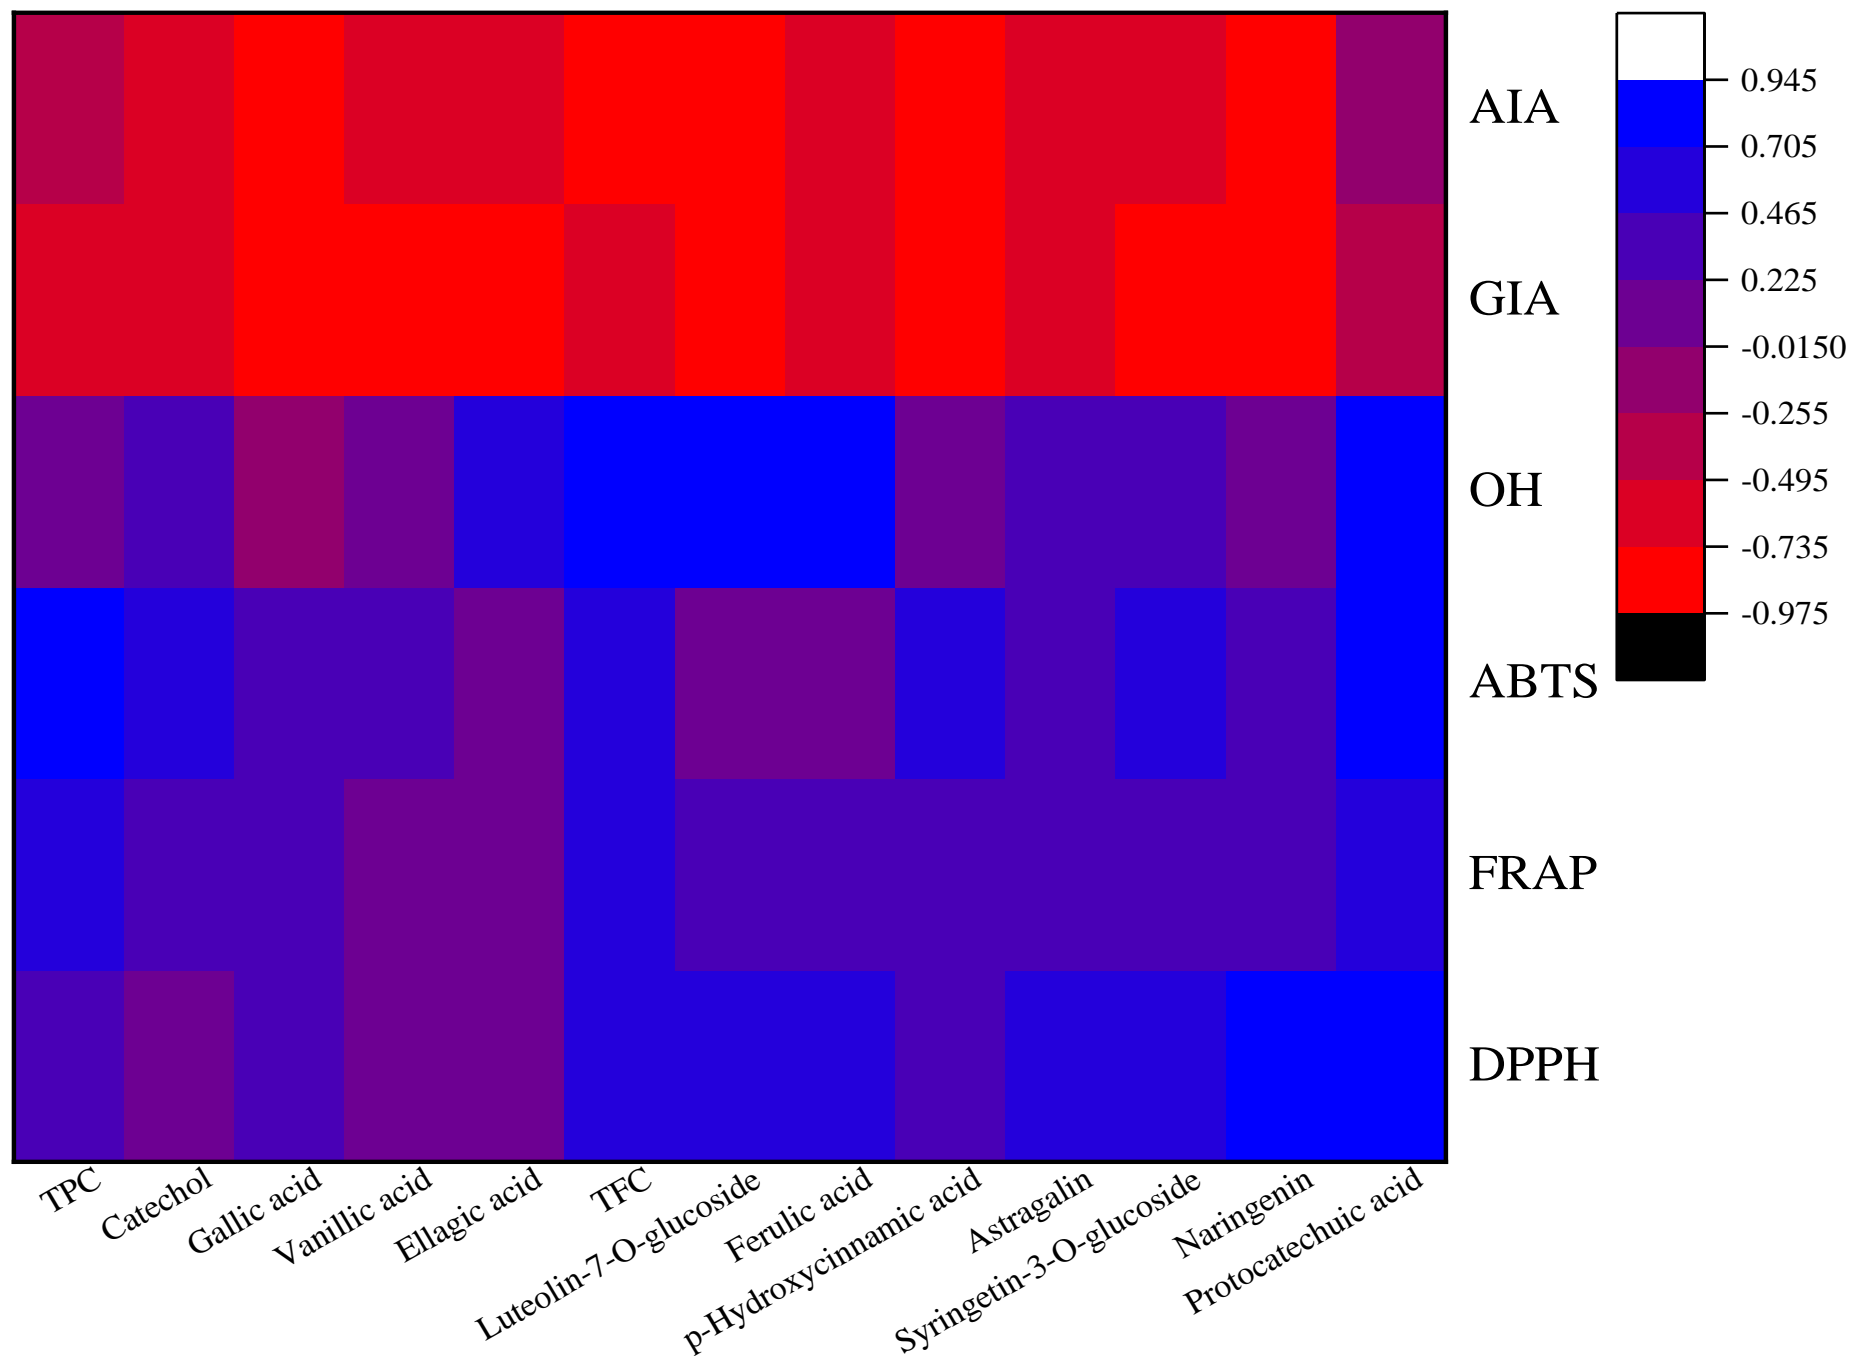

Supplement: s1 [file s1]
